# Supplementary material for: Seasonal variations in aerosol particle composition at the puy-de-Dôme research station in France
Source: Copernicus journal article supplement (doi:10.5194/acp-11-13047-2011), 2011-12-21
Supplement: Supplementary file 1 [file acp-11-13047-2011-supplement.pdf]

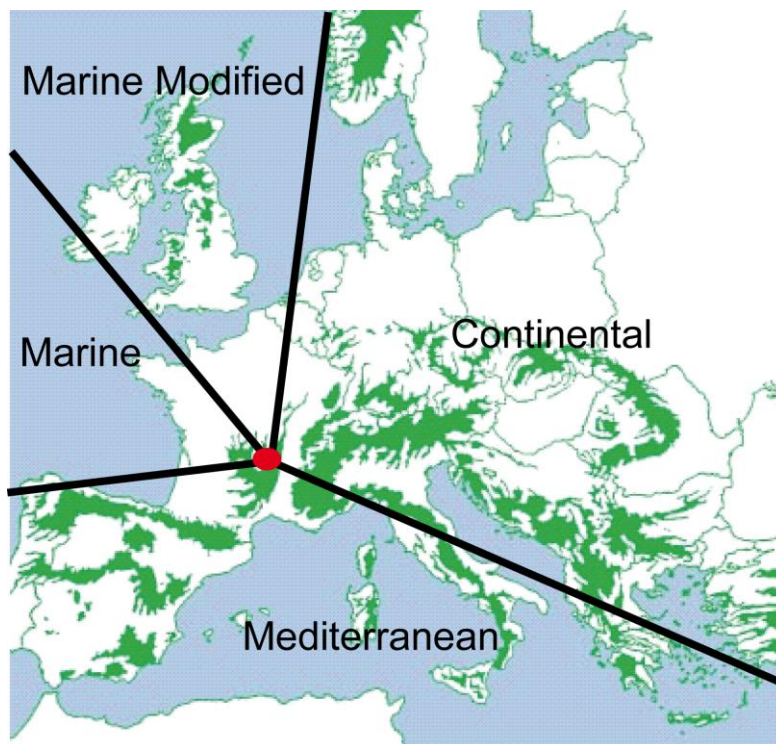

Figure S1. Sector definitions for different airmasses arriving at the pdD site

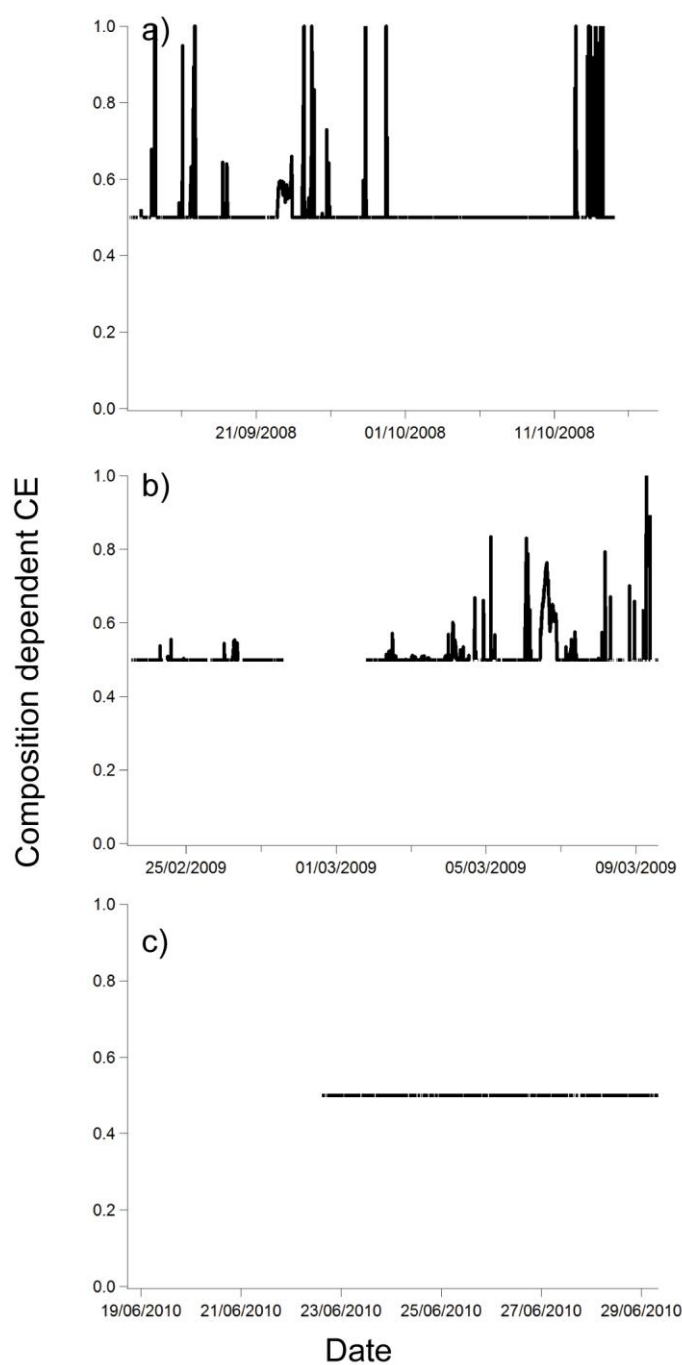

Figure S2. Composition dependent CE as a function of time measured during the a) Autumn 2008, b) Winter 2009, and c) Summer 2010.

Figure S3 Comparison between the particle concentration measured by the SMPS with that measured by the AMS for the autumn c) 2008 and b) winter 2009

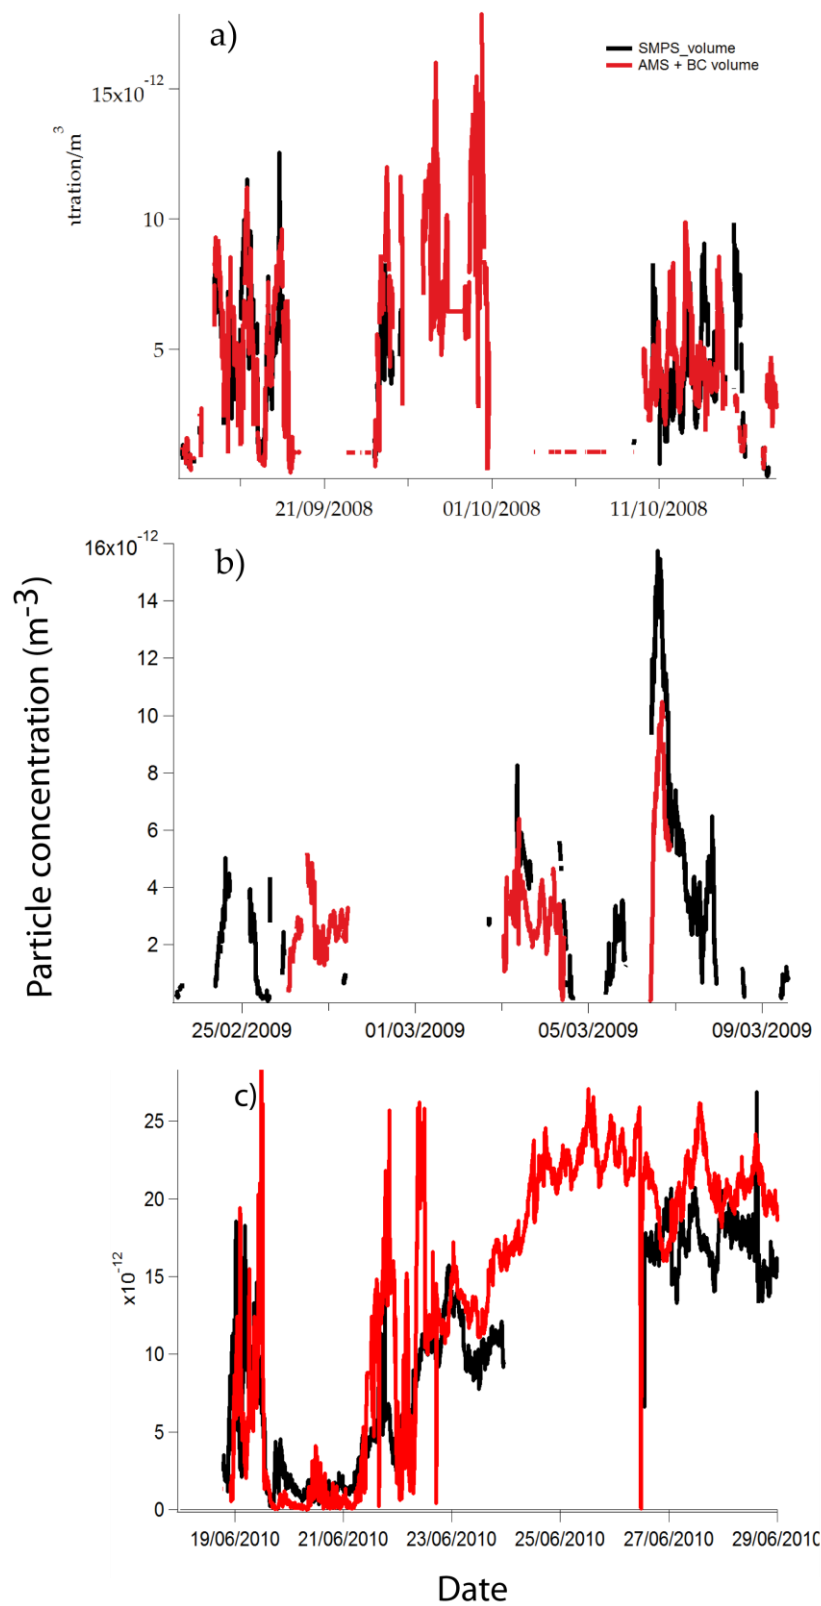

Figure S3 Comparison between the particle concentration measured by the SMPS with that measured by the AMS for the autumn c) 2008 and b) winter 2009

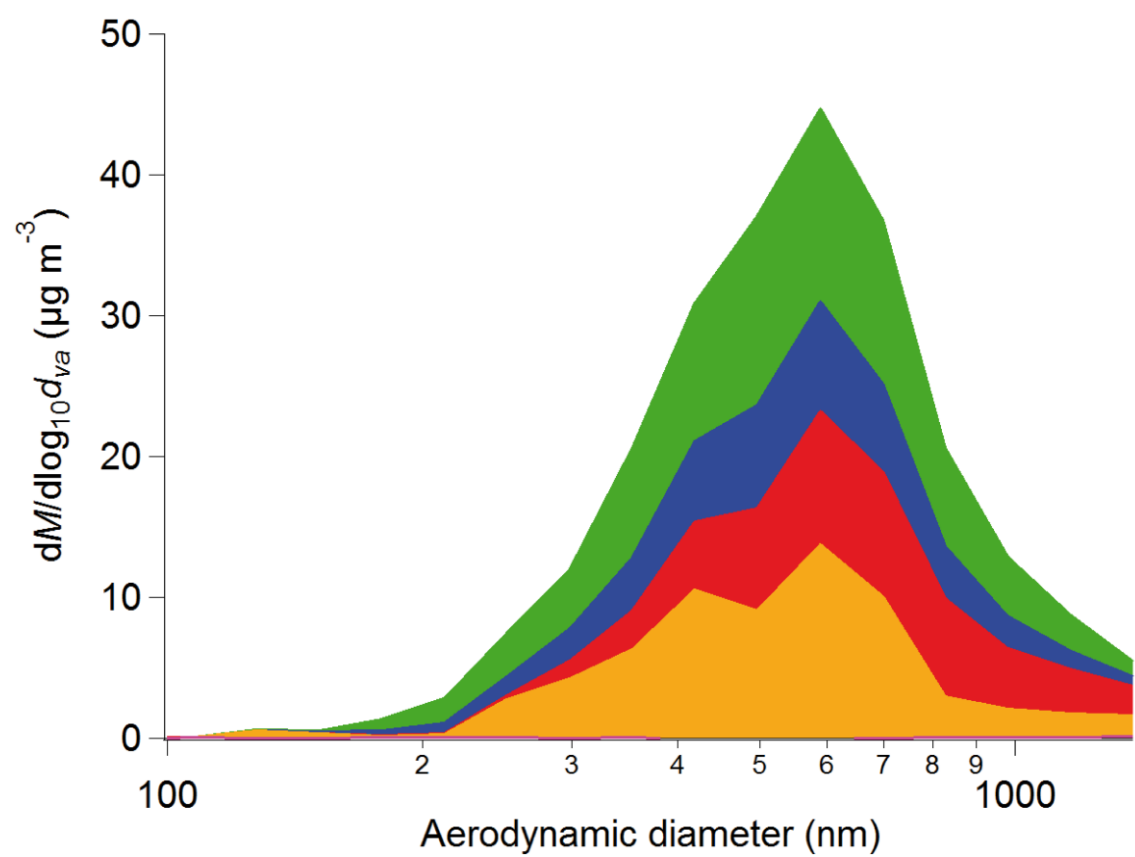

Figures S4. Typical size distribution of the aerosol particle species measured by the AMS at the pdD site.

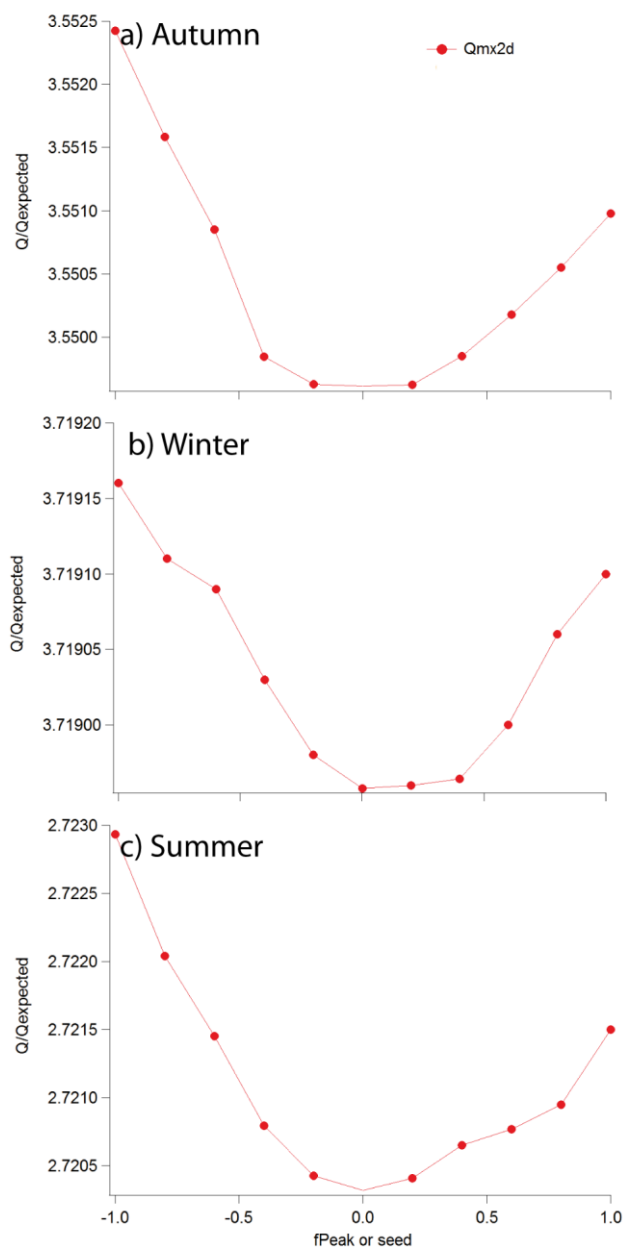

Figure S5.  $Q/Q_{\text{exp}}$  versus the  $f_{\text{peak}}$  values for a) Autumn 2008, b) Winter 2009, and c) Summer 2010.

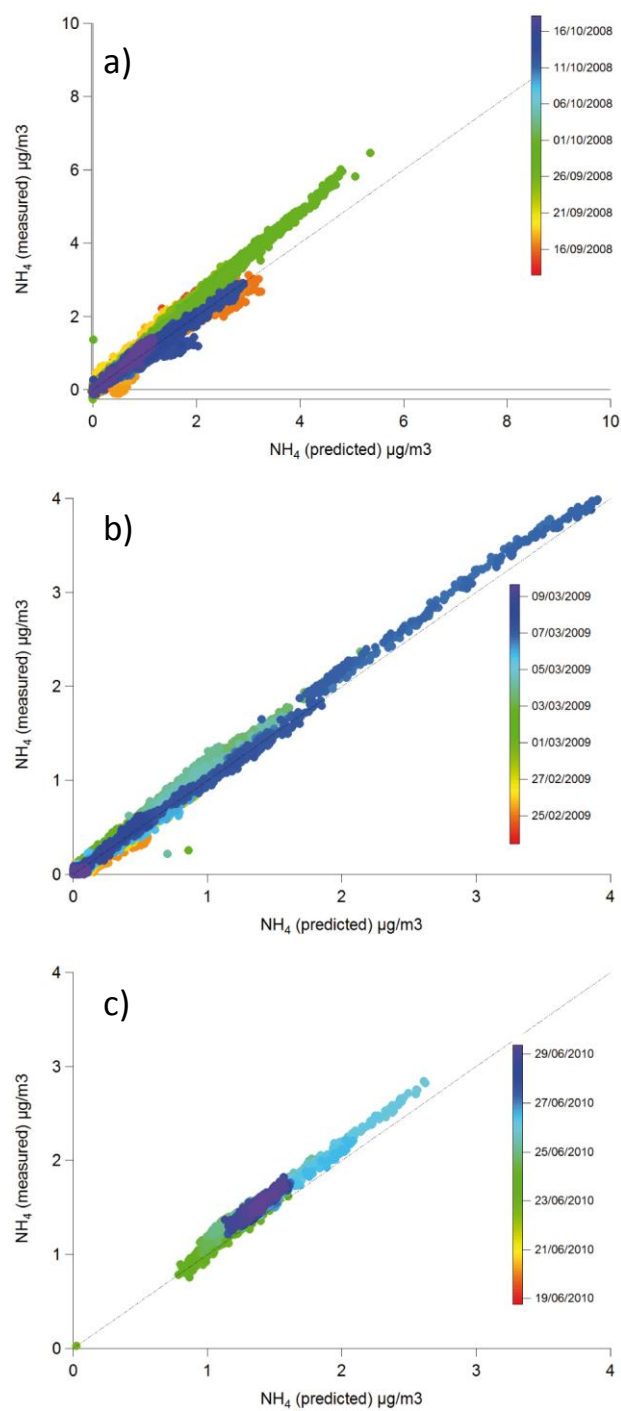

Figure S6. Measured  $\text{NH}_4$  vs predicted  $\text{NH}_4$  during a) Autumn 2008, b) Winter 2009, and c) Summer 2010.

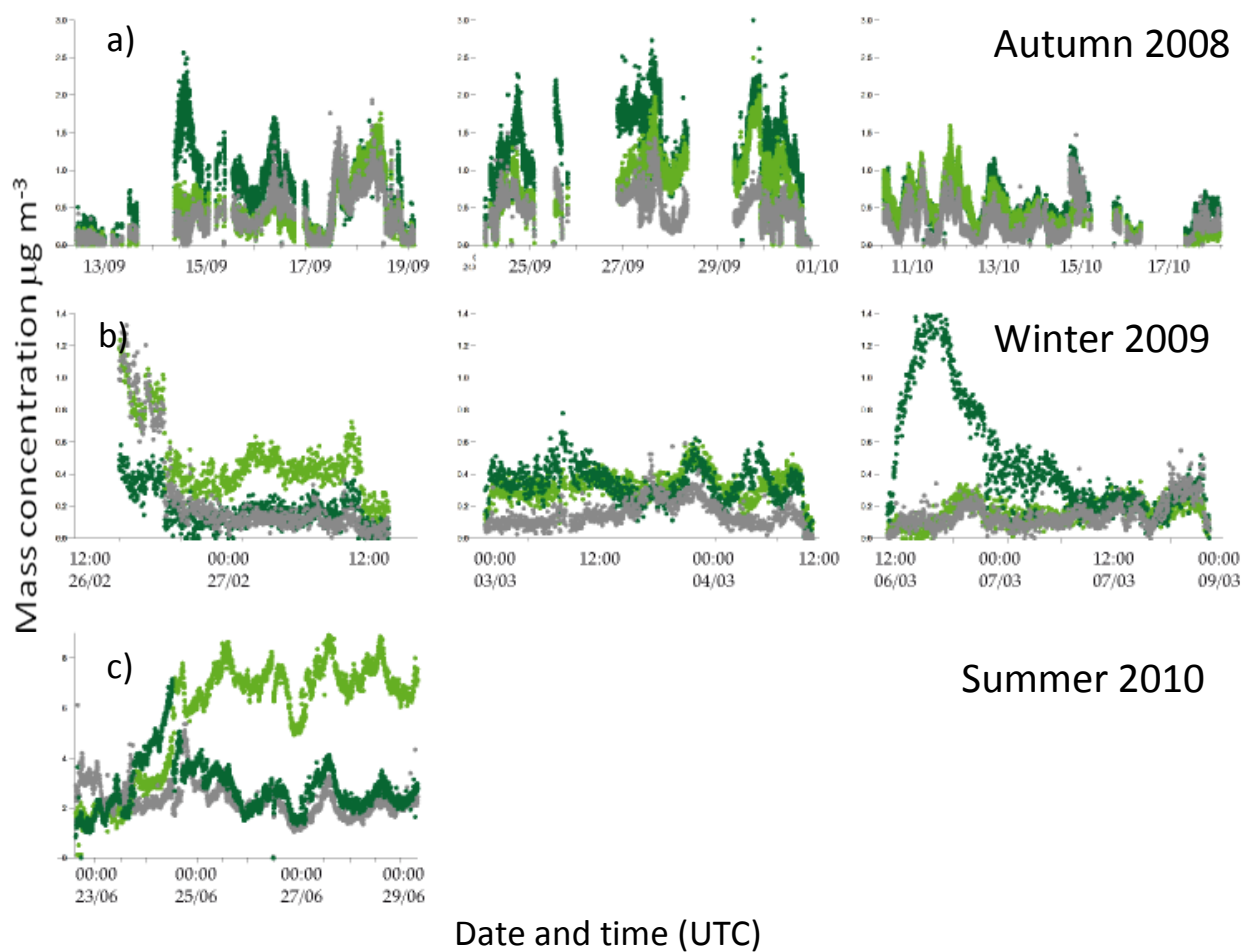

Figure S7. A three factor PMF solution showing the time series of three different secondary oxidised organic species for a) autumn 2008, b) spring 2009, and c) the summer 2010.

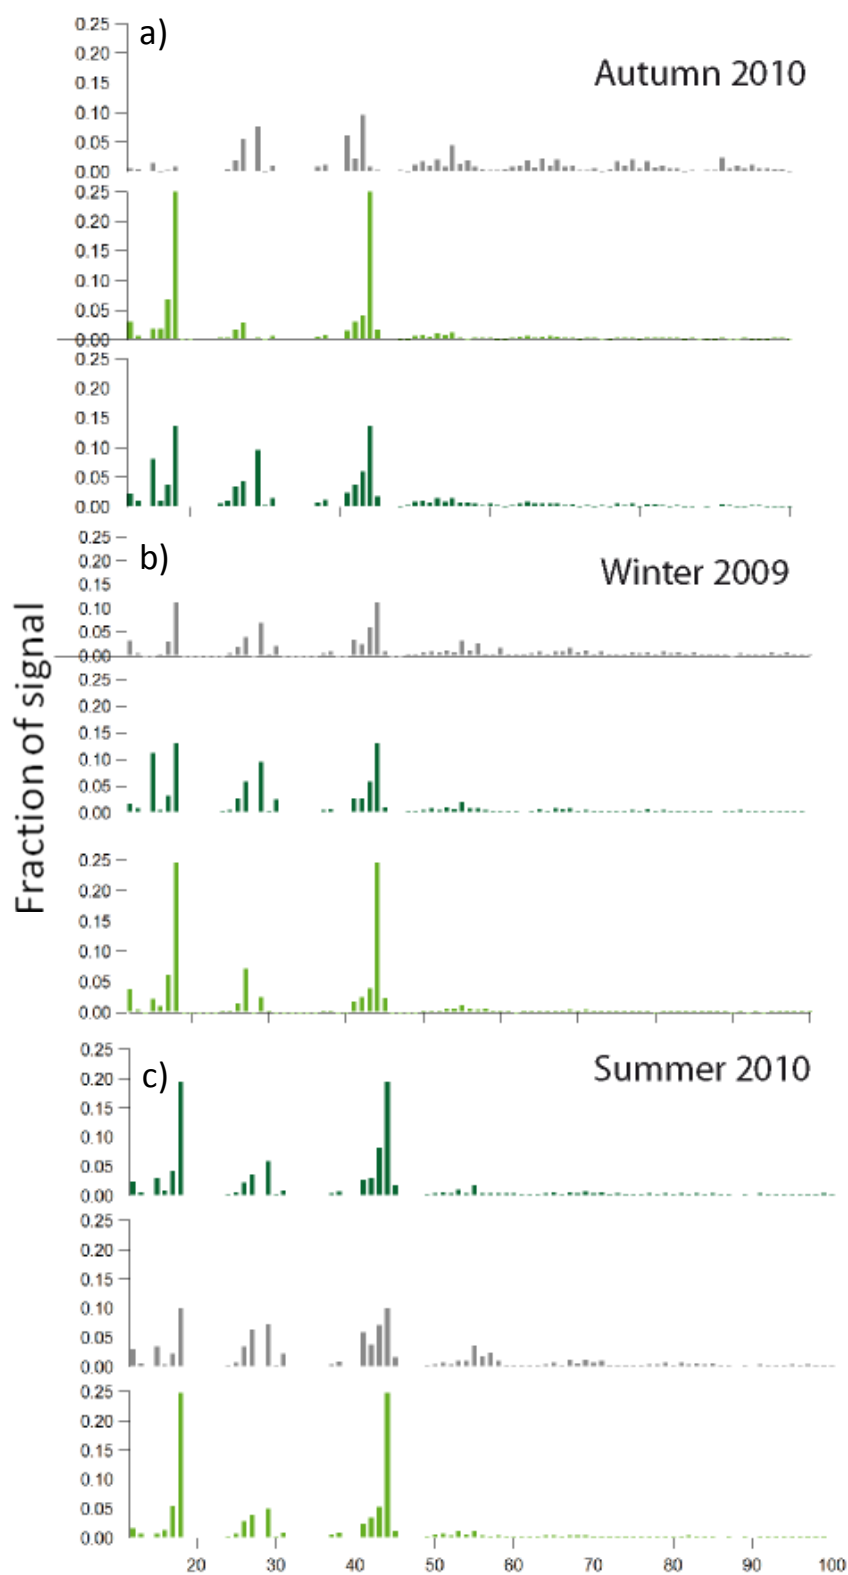

Figure S8. A three factor solution showing the mass spectra for three oxidised organic species measured during a) Autumn 2010, b) Winter 2009, and c) Summer 2010.



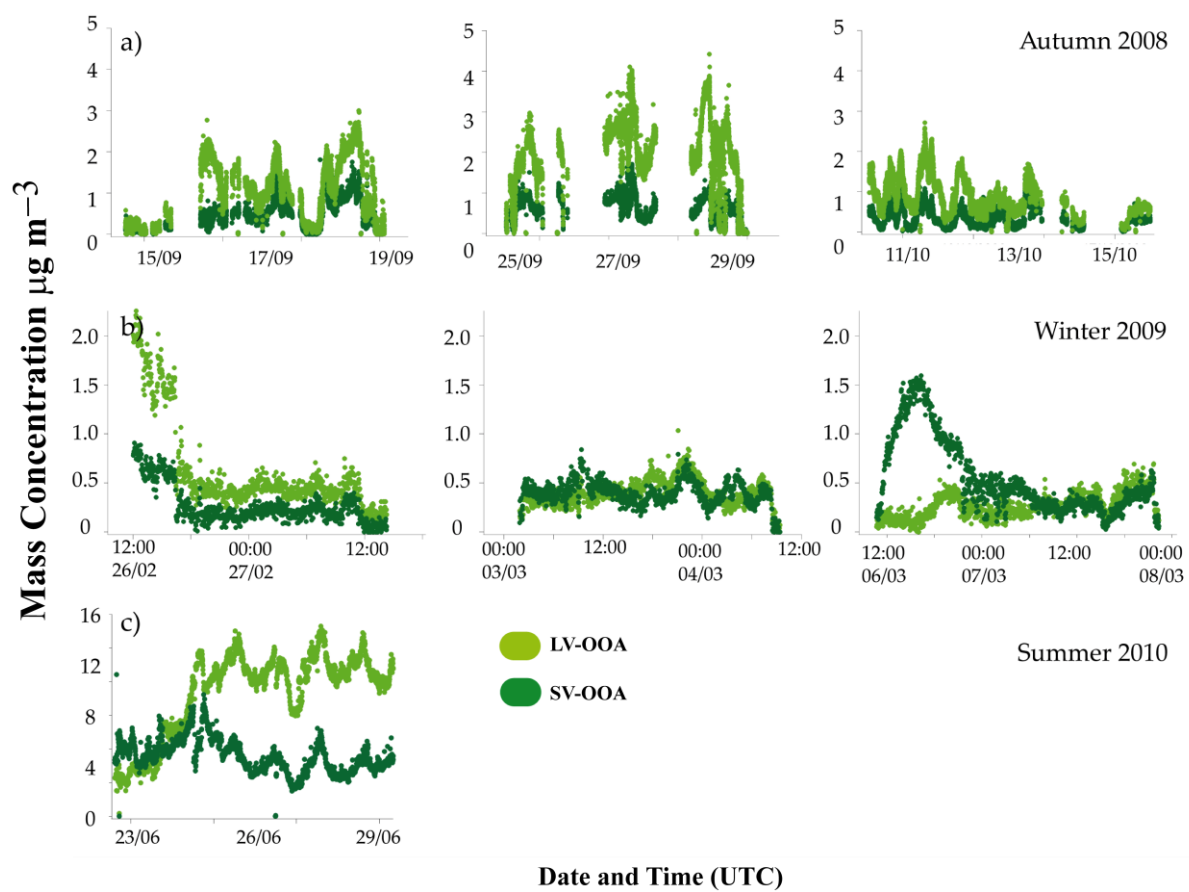

Figure S9. Time series of SV-OOA and LV-OOA sampled during the a) autumn, b) spring, and c) during the summer.

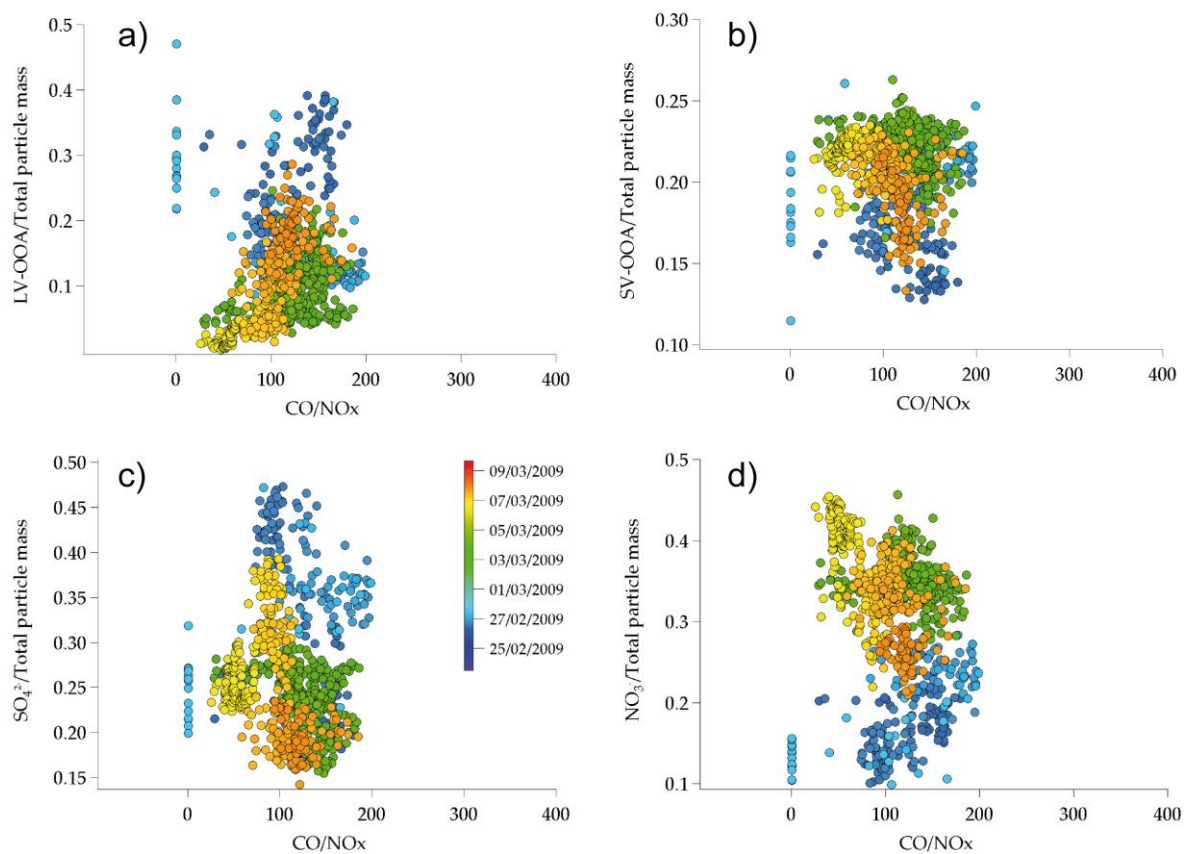

Figure S10 The fraction of a) LV-OOA, b)SV-OOA, c)SO<sub>4</sub>, and d)NO<sub>3</sub> to the total aerosol mass against the measured CO/NO<sub>x</sub> for cloud-free periods during the winter campaign coloured by date.

|                           | Autumn 2008 |        | Winter 2009 |        | Summer 2010 |        |
|---------------------------|-------------|--------|-------------|--------|-------------|--------|
|                           | LV-OOA      | SV-OOA | LV-OOA      | SV-OOA | LV-OOA      | SV-OOA |
| HOA                       | 0.044       | 0.659  | 0.066       | 0.114  | 0.0425      | 0.253  |
| OOA                       | 0.918       | 0.301  | 0.918       | 0.828  | 0.912       | 0.969  |
| LV-OOA                    | 0.953       | 0.249  | 0.934       | 0.857  | 0.942       | 0.952  |
| SV-OOA                    | 0.406       | 0.805  | 0.368       | 0.598  | 0.347       | 0.733  |
| BB-OA                     | 0.288       | 0.787  | 0.251       | 0.538  | 0.222       | 0.616  |
| SOA from $\alpha$ -pinene |             |        |             |        | 0.336       | 0.732  |
| Org                       | 0.962       | 0.828  | 0.563       | 0.466  | 0.851       | 0.072  |
| NO <sub>3</sub>           | 0.506       | 0.316  | 0.047       | 0.859  | 0.008       | 0.01   |
| SO <sub>4</sub>           | 0.338       | 0.149  | 0.027       | 0.742  | 0.299       | 0.249  |
| NH <sub>4</sub>           | 0.669       | 0.364  | 0.039       | 0.867  | 0.319       | 0.135  |
| Chl                       | 0.039       | 0.024  | 0.050       | 0.779  | 0.133       | 0.0832 |
| O <sub>3</sub>            | 0.002       | 0.004  | 0.155       | 0.104  | 0.518       | 0.0256 |
| SO <sub>2</sub>           | 0.012       | 0.015  | 0.013       | 0.017  | 0.117       | 0.018  |
| CO <sub>2</sub>           | 0.027       | 0.029  | 0.090       | 0.272  |             |        |
| CO                        | 0.49        | 0.507  | 0.001       | 0.121  | 0.326       | 0.073  |
| NO <sub>2</sub>           | 0.001       | 0.028  | 0.064       | 0.483  | 0.035       | 0.011  |
| NO                        | 0.137       | 0.335  | 0.0524      | 0.134  | <0.01       | 0.02   |
| BC                        | <0.01       | 0.12   | 0.0075      | 0.311  | 0.445       | 0.0676 |

Table S1. Two factor solution:  $r^2$  correlations of PMF components with reference mass spectra and with time series of gas and particle phase species
